# Supplementary material
Source: MDPI journal article supplement (https://www.mdpi.com/2073-4344/8/2/45)
Supplement: s1 [file s1]

# Supplementary Materials: Synthesis of $\text{Ag}_3\text{PO}_4/\text{g-C}_3\text{N}_4$ Composite with Enhanced Photocatalytic Performance for the Photodegradation of Diclofenac under Visible Light Irradiation

Wei Zhang, Li Zhou, Jun Shi \* and Huiping Deng \*

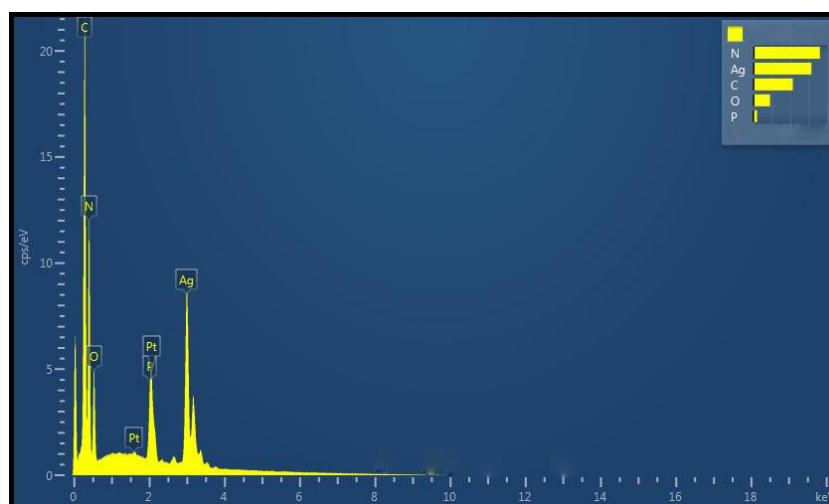

**Figure. S1.** EDS analysis of  $\text{Ag}_3\text{PO}_4/\text{g-C}_3\text{N}_4$  (30%).

The leaching of  $\text{Ag}^+$  after each re-cycle was analyzed by an inductively coupled plasma optical emission spectrometer (ICP-OES), and the result was shown in Table S1.

The maximum concentration of  $\text{Ag}^+$  released from  $\text{Ag}_3\text{PO}_4/\text{g-C}_3\text{N}_4$ (30%) among the five cycles was only  $39.6 \mu\text{g L}^{-1}$  (the total Ag in the solution was  $51.1 \text{ mg L}^{-1}$ ), which indicated that the  $\text{Ag}_3\text{PO}_4/\text{g-C}_3\text{N}_4$ (30%) composite photocatalyst was durable and reusable.

**Table S1.** The concentration of  $\text{Ag}^+$  after each re-cycle test.

| The concentration of $\text{Ag}^+$ ( $\mu\text{g L}^{-1}$ ) |      |
|-------------------------------------------------------------|------|
| 1st                                                         | 39.8 |
| 2nd                                                         | 37.4 |
| 3rd                                                         | 39.6 |
| 4th                                                         | 33.7 |
| 5th                                                         | 35.6 |

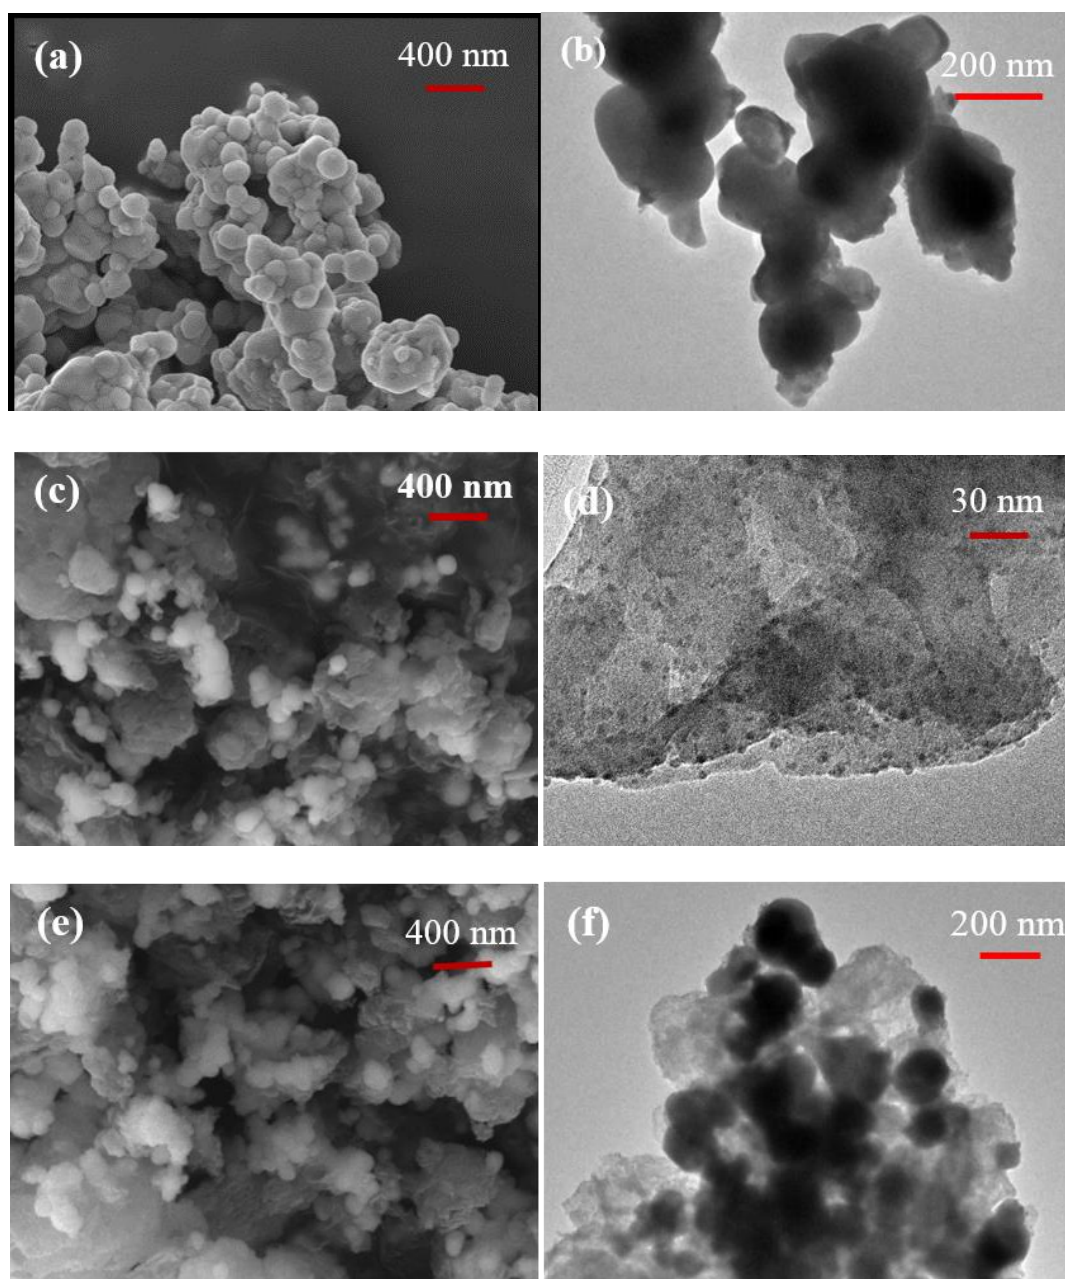

**Figure S2.** SEM images of (a) Ag<sub>3</sub>PO<sub>4</sub>, (c) Ag<sub>3</sub>PO<sub>4</sub>/g-C<sub>3</sub>N<sub>4</sub> (20%) and (e) Ag<sub>3</sub>PO<sub>4</sub>/g-C<sub>3</sub>N<sub>4</sub> (40%), and TEM images (b) Ag<sub>3</sub>PO<sub>4</sub>, (d) Ag<sub>3</sub>PO<sub>4</sub>/g-C<sub>3</sub>N<sub>4</sub> (20%) and (f) Ag<sub>3</sub>PO<sub>4</sub>/g-C<sub>3</sub>N<sub>4</sub> (40%).

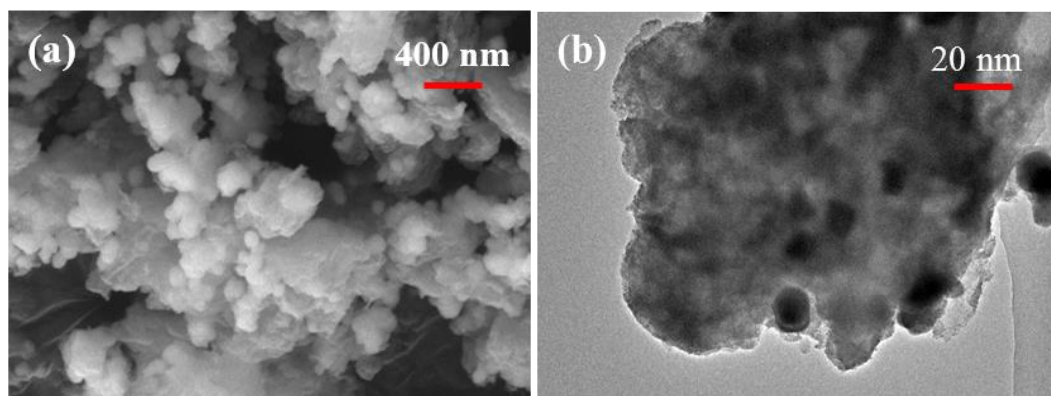

**Figure S3.** SEM and TEM images of  $\text{Ag}_3\text{PO}_4/\text{g-C}_3\text{N}_4$  (30%) after the reaction.
